# Supplementary material for: Drug-Delivery Silver Nanoparticles: A New Perspective for Phenindione as an Anticoagulant
Source: MDPI journal article supplement (doi:10.3390/biomedicines11082201), 2023-08-04

# Drug-Delivery Silver Nanoparticles: A New Perspective for Phenindione as an Anticoagulant

Stoyanka Nikolova <sup>1,\*</sup>, Miglena Milusheva <sup>1,2</sup>, Vera Gledacheva <sup>3</sup>, Mehran Feizi-Dehnayebi <sup>4</sup>, Lidia Kaynarova <sup>5</sup>, Deyana Georgieva <sup>5</sup>, Vassil Delchev <sup>6</sup>, Iliyana Stefanova <sup>3</sup>, Yulian Tumbariski <sup>7</sup>, Rositsa Mihaylova <sup>8</sup>, Emiliya Cherneva <sup>9,10</sup>, Snezhana Stoencheva <sup>11,12</sup> and Mina Todorova <sup>1</sup>

## Supplementary Materials:

|                                                        |        |
|--------------------------------------------------------|--------|
| Figure S1: <sup>1</sup> H-NMR spectrum of phenindione  | page 2 |
| Figure S2: <sup>13</sup> C-NMR spectrum of phenindione | page 2 |
| Figure S3: FT-IR spectrum of phenindione               | page 3 |

**Figure S1.**  $^1\text{H}$ -NMR spectrum of phenindione.

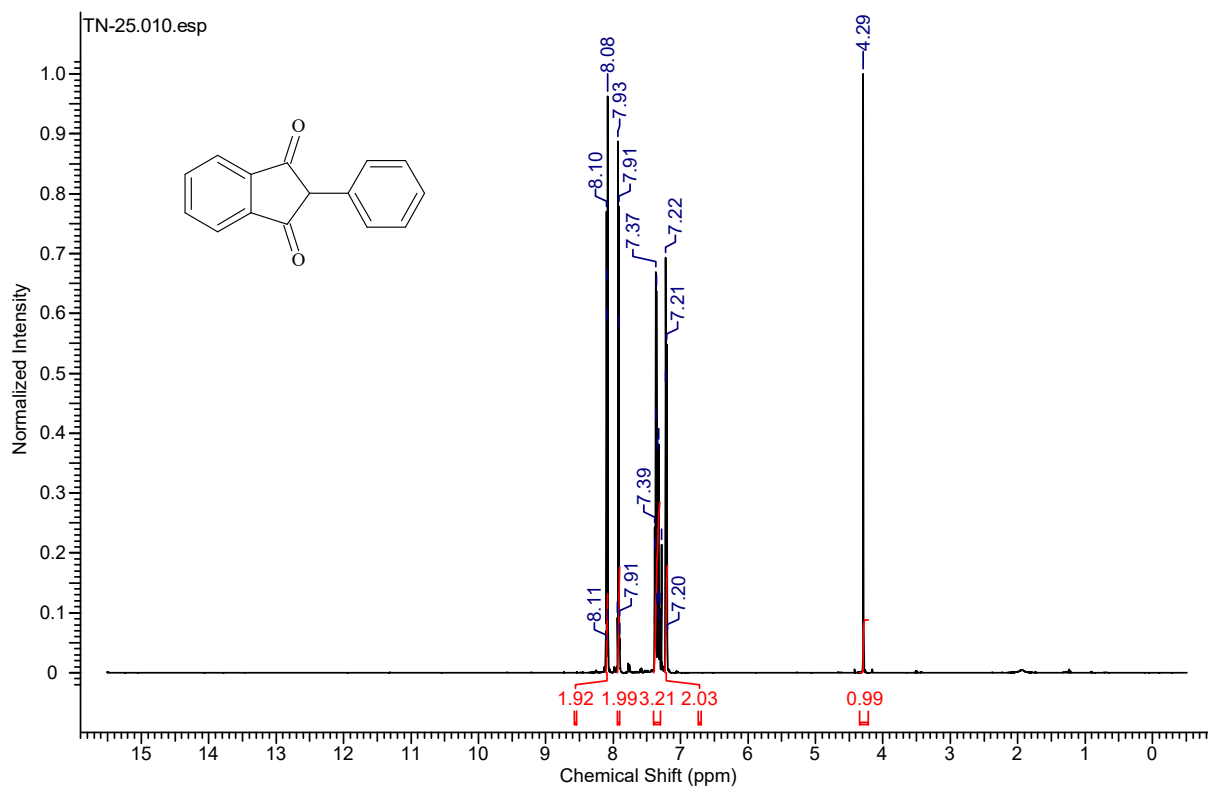

**Figure S2.**  $^{13}\text{C}$ -NMR spectrum of phenindione.

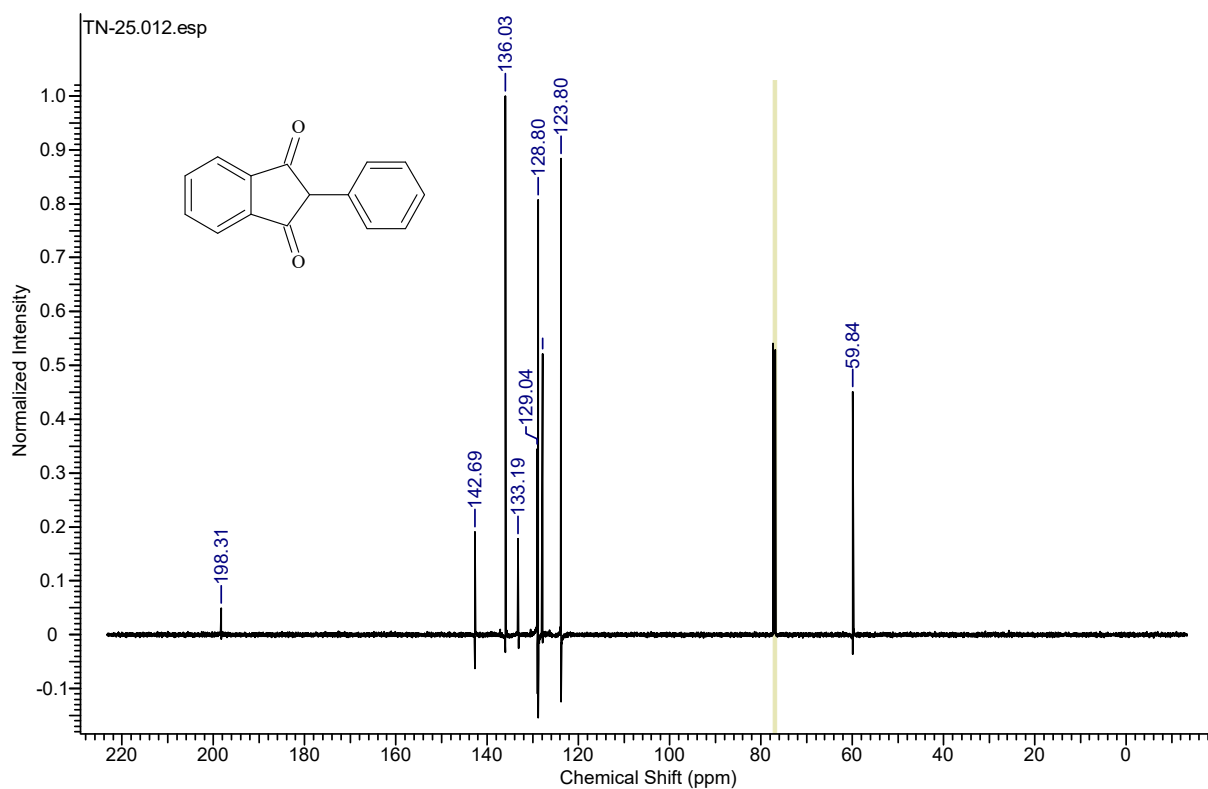

**Figure S3.** FT-IR spectrum of phenindione.

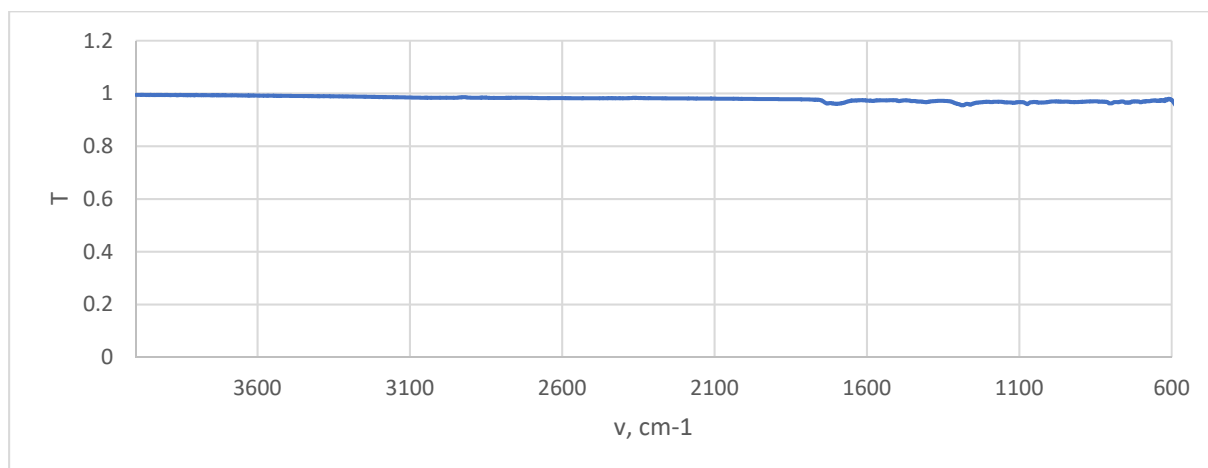

Supplement: s1 [file s1]
